# Supplementary material for: The diversification of species in crop rotation increases the profitability of grain production systems
Source: PubMed Central journal article supplement (PMC9674645; doi:10.1038/s41598-022-23718-4), 2022-11-18
Supplement: 41598_2022_23718_MOESM1_ESM.pdf [file 41598_2022_23718_MOESM1_ESM.pdf]

| Crop      | 1 <sup>st</sup> cycle |        |           |        |           |        | 2 <sup>nd</sup> cycle |        |           |        |           |        |
|-----------|-----------------------|--------|-----------|--------|-----------|--------|-----------------------|--------|-----------|--------|-----------|--------|
|           | 2014-2015             |        | 2015-2016 |        | 2016-2017 |        | 2017-2018             |        | 2018-2019 |        | 2019-2020 |        |
|           | W                     | S      | W         | S      | W         | S      | W                     | S      | W         | S      | W         | S      |
| Maize     | 83.12                 | 93.40  | 85.14     | 130.56 | 135.67    | -      | 66.12                 | 100.70 | 90.30     | 89.31  | 102.07    | -      |
| Soybean   | -                     | 255.73 | -         | 277.20 | -         | 262,92 | -                     | 249.65 | -         | 232.21 | -         | 281.07 |
| Wheat     | 141.07                | -      | -         | -      | 154.37    | -      | 129.43                | -      | -         | -      | 164.25    | -      |
| Beans     | -                     | -      | 447.38    | -      | 1,383.19  | -      | 483.85                | -      | 411.72    | -      | -         | -      |
| Buckwheat | 147.33                | -      | -         | -      | 155.85    | -      | 147.65                | -      | -         | -      | -         | -      |
| Canola    | 266.10                | -      | 261.79    | -      | -         | -      | 226.30                | -      | -         | -      | -         | -      |
| Crambe    | -                     | -      | 139.09    | -      | -         | -      | -                     | -      | -         | -      | -         | -      |
| Safflower | -                     | -      | -         | 235.56 | -         | -      | -                     | -      | -         | -      | -         | -      |
| Triticale | -                     | -      | -         | -      | -         | -      | -                     | -      | 118.73    | -      | -         | -      |

**Supplementary Table S1.** Price (USD Mg<sup>-1</sup>) of the harvested and marketed crops for the 2014-2015 to 2019-2020 crop years in Londrina, state of Paraná, Brazil. “-“: not grown in that crop year. W: winter; S: summer. Data from the Department of Rural Economy of the Paraná State Secretariat of Agriculture and Supply (DERAL-SEAB). Monetary values corrected for inflation according to the Brazilian Extended National Consumer Price Index (IPCA), to December 2021.
