# Supplementary material for: The diversification of species in crop rotation increases the profitability of grain production systems
Source: PubMed Central journal article supplement (PMC9674645; doi:10.1038/s41598-022-23718-4), 2022-11-18
Supplement: 41598_2022_23718_MOESM2_ESM.pdf [file 41598_2022_23718_MOESM2_ESM.pdf]

| Indicator                  | 1 <sup>st</sup> cycle |        |           |        |           |        | 2 <sup>nd</sup> cycle |        |           |        |           |        |
|----------------------------|-----------------------|--------|-----------|--------|-----------|--------|-----------------------|--------|-----------|--------|-----------|--------|
|                            | 2014-2015             |        | 2015-2016 |        | 2016-2017 |        | 2017-2018             |        | 2018-2019 |        | 2019-2020 |        |
|                            | Winter                | Summer | Winter    | Summer | Winter    | Summer | Winter                | Summer | Winter    | Summer | Winter    | Summer |
| <b>System I (AS-I)</b>     |                       |        |           |        |           |        |                       |        |           |        |           |        |
|                            | C                     | S      | C         | S      | C         | S      | C                     | S      | C         | S      | C         | S      |
| Revenue                    | 490                   | 758    | 556       | 898    | 371       | 1,060  | 532                   | 1,033  | 521       | 763    | 545       | 1,019  |
| Cost                       | 692                   | 634    | 704       | 639    | 607       | 625    | 618                   | 525    | 776       | 465    | 491       | 513    |
| Profit                     | -202                  | 124    | -147      | 259    | -236      | 434    | -87                   | 508    | -255      | 298    | 54        | 506    |
| <b>System II (AS-II)</b>   |                       |        |           |        |           |        |                       |        |           |        |           |        |
|                            | WO                    | S      | RY        | C      | W         | S      | WO                    | S      | TR        | C      | W         | S      |
| Revenue                    | 322                   | 900    | --        | 1,288  | 581       | 1,097  | 336                   | 1,066  | 404       | 786    | 631       | 1,086  |
| Cost                       | 455                   | 620    | 377       | 782    | 676       | 634    | 364                   | 521    | 526       | 700    | 518       | 520    |
| Profit                     | -133                  | 279    | -377      | 506    | -96       | 464    | -27                   | 544    | -123      | 86     | 113       | 566    |
| <b>System III (AS-III)</b> |                       |        |           |        |           |        |                       |        |           |        |           |        |
|                            | BO+RY                 | S      | BO+R      | C      | BR        | S      | BO+RY                 | S      | BO+R      | C      | BR        | S      |
| Revenue                    | --                    | 877    | --        | 1,345  | --        | 1,075  | --                    | 1,056  | --        | 782    | --        | 1,081  |
| Cost                       | 191                   | 631    | 156       | 789    | 166       | 641    | 113                   | 520    | 157       | 700    | 124       | 521    |
| Profit                     | -191                  | 247    | -156      | 556    | -166      | 434    | -113                  | 536    | -157      | 83     | -124      | 561    |
| <b>System IV (AS-IV)</b>   |                       |        |           |        |           |        |                       |        |           |        |           |        |
|                            | CL                    | C      | CM        | C      | SF        | S      | CL                    | C      | CM        | C      | CL        | S      |
| Revenue                    | 467                   | 1,046  | 205       | 1,208  | 237       | 1,128  | 83                    | 1,073  | --        | 771    | 253       | 1,132  |
| Cost                       | 342                   | 734    | 483       | 697    | 411       | 647    | 327                   | 827    | 216       | 698    | 274       | 525    |
| Profit                     | 125                   | 312    | -278      | 511    | -174      | 481    | -244                  | 245    | -216      | 73     | -21       | 607    |
| <b>System V (AS-V)</b>     |                       |        |           |        |           |        |                       |        |           |        |           |        |
|                            | BW/R                  | C      | B         | S      | BW/WO     | S      | BW+R                  | C      | B         | S      | BW/WO     | S      |
| Revenue                    | 171                   | 993    | 888       | 833    | 122       | 1,143  | 244                   | 1,158  | 896       | 801    | 245       | 1,026  |
| Cost                       | 462                   | 781    | 751       | 580    | 497       | 648    | 325                   | 745    | 671       | 470    | 316       | 514    |
| Profit                     | -291                  | 211    | 136       | 254    | -375      | 494    | -81                   | 414    | 224       | 331    | -71       | 512    |
| <b>System VI (AS-VI)</b>   |                       |        |           |        |           |        |                       |        |           |        |           |        |
|                            | W                     | C+BR   | CL        | C      | B         | S      | W                     | C      | CL        | C+BR   | B         | S      |
| Revenue                    | 259                   | 984    | 299       | 1,252  | 1,073     | 1,125  | 524                   | 1,041  | 303       | 707    | 962       | 1,143  |
| Cost                       | 458                   | 755    | 444       | 709    | 1,017     | 647    | 560                   | 825    | 363       | 727    | 499       | 526    |
| Profit                     | -199                  | 229    | -146      | 543    | 56        | 479    | -36                   | 217    | -60       | -20    | 463       | 618    |

**Supplementary Table S2.** Revenue, cost and profit (US\$ ha<sup>-1</sup>) of the grain production systems for the 2014-2015 to 2019-2020 crop years. WO: white oat, BO: black oat, BR: brachiaria, CL: canola, CM: crambe, RY: rye, SF: safflower, B: bean, C: corn, R: forage radish, S: soybean, W: wheat, BW: buckwheat, TR: triticale.
