# Supplementary material for: The diversification of species in crop rotation increases the profitability of grain production systems
Source: PubMed Central journal article supplement (PMC9674645; doi:10.1038/s41598-022-23718-4), 2022-11-18
Supplement: 41598_2022_23718_MOESM3_ESM.pdf [file 41598_2022_23718_MOESM3_ESM.pdf]

| Indicator                  | 1 <sup>st</sup> cycle |        |           |        |           |        | 2 <sup>nd</sup> cycle |        |           |        |           |        |
|----------------------------|-----------------------|--------|-----------|--------|-----------|--------|-----------------------|--------|-----------|--------|-----------|--------|
|                            | 2014-2015             |        | 2015-2016 |        | 2016-2017 |        | 2017-2018             |        | 2018-2019 |        | 2019-2020 |        |
|                            | Winter                | Summer | Winter    | Summer | Winter    | Summer | Winter                | Summer | Winter    | Summer | Winter    | Summer |
| <b>System I (AS-I)</b>     |                       |        |           |        |           |        |                       |        |           |        |           |        |
|                            | C                     | S      | C         | S      | C         | S      | C                     | S      | C         | S      | C         | S      |
| Total cost                 | 692                   | 634    | 704       | 639    | 607       | 625    | 618                   | 525    | 776       | 465    | 491       | 513    |
| Inputs                     | 427                   | 292    | 413       | 282    | 395       | 326    | 388                   | 258    | 533       | 241    | 293       | 261    |
| Seeds                      | 125                   | 76     | 130       | 51     | 104       | 109    | 163                   | 75     | 145       | 66     | 106       | 95     |
| Fertilizers                | 169                   | 79     | 170       | 84     | 158       | 75     | 124                   | 67     | 152       | 56     | 121       | 88     |
| Pesticides                 | 133                   | 137    | 112       | 147    | 133       | 142    | 102                   | 116    | 236       | 118    | 66        | 78     |
| Agric. operations          | 179                   | 249    | 201       | 257    | 139       | 193    | 148                   | 171    | 148       | 145    | 127       | 157    |
| Other costs                | 86                    | 93     | 90        | 100    | 73        | 106    | 81                    | 96     | 95        | 78     | 70        | 94     |
| <b>System II (AS-II)</b>   |                       |        |           |        |           |        |                       |        |           |        |           |        |
|                            | WO                    | S      | RY        | C      | W         | S      | WO                    | S      | TR        | C      | W         | S      |
| Total cost                 | 455                   | 620    | 377       | 782    | 676       | 634    | 364                   | 521    | 526       | 700    | 518       | 520    |
| Inputs                     | 262                   | 292    | 252       | 381    | 371       | 326    | 170                   | 258    | 340       | 409    | 301       | 261    |
| Seeds                      | 78                    | 76     | 77        | 103    | 97        | 109    | 43                    | 75     | 38        | 103    | 43        | 95     |
| Fertilizers                | 131                   | 79     | 152       | 167    | 135       | 75     | 53                    | 67     | 164       | 194    | 141       | 88     |
| Pesticides                 | 54                    | 137    | 24        | 111    | 140       | 142    | 73                    | 116    | 137       | 112    | 116       | 78     |
| Agric. operations          | 136                   | 230    | 90        | 271    | 217       | 199    | 145                   | 166    | 119       | 191    | 140       | 160    |
| Other costs                | 57                    | 98     | 35        | 131    | 89        | 109    | 49                    | 97     | 67        | 100    | 77        | 98     |
| <b>System III (AS-III)</b> |                       |        |           |        |           |        |                       |        |           |        |           |        |
|                            | BO+RY                 | S      | BO+R      | C      | BR        | S      | BO+RY                 | S      | BO+R      | C      | BR        | S      |
| Total cost                 | 191                   | 631    | 156       | 789    | 166       | 641    | 113                   | 520    | 157       | 700    | 124       | 521    |
| Inputs                     | 82                    | 274    | 63        | 381    | 62        | 326    | 37                    | 258    | 85        | 409    | 29        | 263    |
| Seeds                      | 38                    | 58     | 39        | 103    | 30        | 109    | 25                    | 75     | 30        | 103    | 13        | 95     |
| Fertilizers                | 0                     | 79     | 0         | 167    | 0         | 75     | 0                     | 67     | 0         | 194    | 0         | 88     |
| Pesticides                 | 44                    | 137    | 24        | 111    | 32        | 142    | 12                    | 116    | 55        | 112    | 16        | 80     |
| Agric. operations          | 90                    | 258    | 78        | 274    | 88        | 207    | 64                    | 166    | 57        | 191    | 83        | 160    |
| Other costs                | 18                    | 98     | 15        | 134    | 16        | 108    | 11                    | 97     | 15        | 100    | 12        | 98     |
| <b>System IV (AS-VI)</b>   |                       |        |           |        |           |        |                       |        |           |        |           |        |
|                            | CL                    | C      | CM        | C      | SF        | S      | CL                    | C      | CM        | C      | CL        | S      |
| Total cost                 | 342                   | 734    | 483       | 697    | 411       | 647    | 327                   | 827    | 216       | 698    | 274       | 525    |
| Inputs                     | 170                   | 404    | 265       | 360    | 241       | 326    | 208                   | 484    | 138       | 409    | 155       | 261    |
| Seeds                      | 4                     | 147    | 56        | 97     | 31        | 109    | 77                    | 111    | 18        | 103    | 6         | 95     |
| Fertilizers                | 131                   | 167    | 172       | 167    | 142       | 75     | 104                   | 159    | 97        | 194    | 133       | 88     |
| Pesticides                 | 35                    | 90     | 37        | 96     | 68        | 142    | 27                    | 214    | 23        | 112    | 16        | 78     |
| Agric. operations          | 119                   | 215    | 164       | 217    | 121       | 210    | 84                    | 218    | 57        | 189    | 81        | 163    |
| Other costs                | 53                    | 115    | 54        | 119    | 49        | 111    | 34                    | 125    | 21        | 100    | 37        | 101    |
| <b>System V (AS-V)</b>     |                       |        |           |        |           |        |                       |        |           |        |           |        |
|                            | BW/R                  | C      | B         | S      | BW/WO     | S      | BW/R                  | C      | B         | S      | BW/WO     | S      |
| Total cost                 | 462                   | 781    | 751       | 580    | 497       | 648    | 325                   | 745    | 671       | 470    | 316       | 514    |
| Inputs                     | 261                   | 424    | 410       | 268    | 293       | 326    | 129                   | 399    | 444       | 241    | 131       | 261    |
| Seeds                      | 63                    | 166    | 137       | 51     | 99        | 109    | 101                   | 107    | 139       | 66     | 102       | 95     |
| Fertilizers                | 112                   | 167    | 152       | 84     | 132       | 75     | 0                     | 159    | 164       | 56     | 0         | 88     |
| Pesticides                 | 87                    | 90     | 121       | 133    | 61        | 142    | 28                    | 133    | 141       | 118    | 29        | 78     |
| Agric. operations          | 150                   | 240    | 233       | 220    | 153       | 211    | 154                   | 224    | 124       | 148    | 144       | 157    |
| Other costs                | 50                    | 117    | 109       | 92     | 51        | 112    | 42                    | 122    | 103       | 80     | 41        | 95     |
| <b>System VI (AS-VI)</b>   |                       |        |           |        |           |        |                       |        |           |        |           |        |
|                            | W                     | C+BR   | CL        | C      | B         | S      | W                     | C      | CL        | C+BR   | B         | S      |
| Total cost                 | 458                   | 755    | 444       | 709    | 1.017     | 647    | 560                   | 825    | 363       | 727    | 499       | 526    |
| Inputs                     | 277                   | 431    | 233       | 366    | 705       | 326    | 385                   | 399    | 199       | 397    | 262       | 261    |
| Seeds                      | 93                    | 176    | 5         | 103    | 289       | 109    | 113                   | 107    | 4         | 116    | 20        | 95     |
| Fertilizers                | 131                   | 167    | 172       | 167    | 158       | 75     | 111                   | 159    | 141       | 194    | 121       | 88     |
| Pesticides                 | 54                    | 87     | 56        | 96     | 259       | 142    | 162                   | 133    | 54        | 87     | 121       | 78     |
| Agric. operations          | 127                   | 210    | 157       | 220    | 170       | 210    | 99                    | 302    | 116       | 231    | 147       | 163    |
| Other costs                | 54                    | 114    | 55        | 123    | 142       | 111    | 76                    | 123    | 48        | 99     | 91        | 101    |

**Supplementary Table S3.** Production cost of the grain production systems for the 2014-2015 to 2019-2020 crop years (in US\$ ha<sup>-1</sup>). WO: white oat, BO: black oat, BR: brachiaria, CL: canola, CM: crambe, RY: rye, SF: safflower, B: bean, C: corn, R: forage radish, S: soybean, W: wheat, BW: buckwheat, TR: triticale.
